# Supplementary material
Source: MDPI journal article supplement (https://www.mdpi.com/2073-445X/11/2/287)
Supplement: s1 [file s1]

**Table S2.** Forest fragmentation patterns used fragmentation index value of 1990, 2000, 2008 and 2014 in 64 forest ecosystems

| Rates of change                                                                     | Code | Ecosystem type                                                                    | Total area (km <sup>2</sup> ) | 2014 forest (%) | Protected (%) | FFI   |       |       |       |
|-------------------------------------------------------------------------------------|------|-----------------------------------------------------------------------------------|-------------------------------|-----------------|---------------|-------|-------|-------|-------|
|                                                                                     |      |                                                                                   |                               |                 |               | 1990  | 2000  | 2008  | 2014  |
| 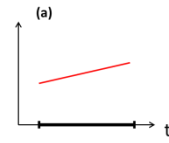   | 32   | Low montane deciduous forest of the Catamayo- Alamor                              | 48.2                          | 5.65            | 0             | 46.98 | 47.54 | 48.48 | 49.17 |
|                                                                                     | 25   | Montane evergreen forest of the Catamayo-Alamor                                   | 582.4                         | 50.40           | 0.96          | 25.12 | 25.96 | 27.44 | 27.78 |
|                                                                                     | 27   | Low montane evergreen forest of the Catamayo- Alamor                              | 60.03                         | 51.28           | 0             | 22.50 | 25.99 | 26.47 | 27.66 |
|                                                                                     | 43   | Piedmont evergreen forest of the south-eastern Andean range                       | 1,093.65                      | 67.90           | 5.42          | 14.05 | 16.29 | 18.39 | 21.21 |
|                                                                                     | 1    | Flood alluvial plain forest of the Equatorial Chocó                               | 118.11                        | 75.93           | 63.66         | 13.07 | 14.58 | 15.24 | 18.22 |
|                                                                                     | 7    | Low montane evergreen forest of Chocó coastal range                               | 254.46                        | 78.54           | 59.75         | 10.08 | 12.11 | 13.90 | 15.81 |
|                                                                                     | 3    | Bosque siempreverde de tierras bajas del Chocó Ecuatorial                         | 3,555.97                      | 81.02           | 4.06          | 7.54  | 8.96  | 10.57 | 11.79 |
|                                                                                     | 61   | Flood river (originated in the Amazon) alluvial plain forest                      | 747.66                        | 95.22           | 60.51         | 10.43 | 10.51 | 10.59 | 11.14 |
|                                                                                     | 40   | Low montane evergreen forest of the south-eastern Andean range                    | 2,104.45                      | 87.98           | 23.10         | 7.97  | 8.71  | 9.91  | 11.00 |
|                                                                                     | 57   | Flood river (originated in the Andean and Amazonian ranges) alluvial-plain forest | 1,691.52                      | 91.61           | 19.07         | 9.07  | 9.10  | 9.17  | 10.15 |
|                                                                                     | 59   | Flood alluvial plain forest of the Amazon                                         | 3,363.85                      | 98.19           | 41.64         | 8.46  | 8.54  | 8.57  | 8.75  |
|                                                                                     | 47   | Piedmont evergreen forest of the Cóndor-Kutukú range                              | 5,241.05                      | 89.04           | 0.83          | 6.44  | 6.81  | 7.27  | 8.47  |
|                                                                                     | 52   | Piedmont evergreen forest on limestone outcrops of the Amazonian range            | 187.25                        | 94.16           | 6.57          | 5.79  | 6.18  | 6.20  | 6.94  |
|                                                                                     | 39   | Piedmont evergreen forest of the north-eastern Andean range                       | 6,611.37                      | 92.94           | 20.45         | 5.54  | 5.59  | 5.85  | 6.81  |
|                                                                                     | 26   | High montane evergreen forest of the Catamayo-Alamor                              | 174.51                        | 71.76           | 8.08          | 19.49 | 19.80 | 20.14 | 20.74 |
|                                                                                     | 50   | Piedmont evergreen forest on sandstone plateaus of the Cóndor-Kutukú range        | 191.55                        | 95.99           | 1.76          | 3.72  | 4.31  | 5.10  | 5.56  |
|                                                                                     | 48   | Low montane evergreen forest of the Cóndor-Kutukú range                           | 2,564.82                      | 96.67           | 10.30         | 4.48  | 4.97  | 5.28  | 5.42  |
|    | 44   | Piedmont semideciduous forest of the south-eastern Andean range                   | 96.69                         | 32.82           | 0             | 17.39 | 24.32 | 26.92 | 36.03 |
|                                                                                     | 6    | Piedmont seasonal evergreen forest of the Chocó coastal range                     | 1,078.15                      | 71.11           | 36.84         | 11.87 | 14.03 | 17.62 | 18.67 |
|   | 33   | Semideciduous forest and shrubland of the North Valleys                           | 593.94                        | 0.11            | 0.02          | 33.33 | 33.33 | 33.33 | 68.76 |
|                                                                                     | 29   | Piedmont semideciduous forest of the Catamayo-Alamor                              | 1,619.26                      | 65.39           | 0             | 15.95 | 16.57 | 16.88 | 19.11 |
|                                                                                     | 22   | Piedmont seasonal evergreen forest of the western Andean range                    | 619.11                        | 71.80           | 0             | 14.26 | 14.40 | 13.96 | 18.53 |
|                                                                                     | 18   | Piedmont evergreen forest of the western Andean range                             | 3,789.81                      | 85.73           | 30.79         | 8.50  | 8.93  | 8.80  | 10.52 |
|                                                                                     | 14   | Deciduous forest of the Jama-Zapotillo lowland                                    | 2,870.66                      | 81.60           | 2.61          | 10.83 | 10.39 | 10.66 | 12.58 |
|                                                                                     | 15   | Deciduous forest of the Equatorial Pacific coastal range                          | 411.23                        | 78.70           | 13.04         | 13.94 | 13.61 | 13.87 | 15.02 |
|                                                                                     | 19   | Low montane evergreen forest of the western Andean range                          | 2,432.28                      | 81.62           | 28.42         | 11.14 | 11.92 | 11.84 | 13.14 |
|                                                                                     | 2    | Equatorial Chocó mangrove                                                         | 22,961.07                     | 76.68           | 89.70         | 16.01 | 15.89 | 16.50 | 17.98 |
|                                                                                     | 10   | Low forest and deciduous shrubland of the Jama-Zapotillo lowland                  | 1,980.74                      | 13.71           | 5.72          | 33.85 | 34.23 | 35.27 | 37.48 |
|                                                                                     | 31   | Piedmont deciduous forest of the Catamayo-Alamor                                  | 394.79                        | 60.74           | 0             | 16.13 | 16.22 | 16.82 | 20.91 |
|  | 24   | Low montane seasonal evergreen forest of the Catamayo-Alamor                      | 168.33                        | 55.62           | 0             | 24.66 | 28.43 | 28.43 | 28.71 |
|                                                                                     | 49   | Montane evergreen forest of the Cóndor-Kutukú range                               | 1,011.85                      | 97.88           | 18.72         | 3.99  | 4.34  | 4.70  | 4.69  |
|  | 5    | Seasonal evergreen forest of Equatorial Chocó lowlands                            | 928.08                        | 66.57           | 27.01         | 42.52 | 18.47 | 19.13 | 20.55 |
|                                                                                     | 45   | Low montane evergreen forest of Galeras                                           | 27.82                         | 100.00          | 100           | 2.47  | 1.85  | 1.85  | 1.85  |
|                                                                                     | 46   | Piedmont evergreen forest of Galeras                                              | 83.67                         | 99.97           | 87.55         | 2.13  | 1.71  | 1.72  | 1.72  |

|                                                                                   |    |                                                                                           |            |        |       |       |       |       |       |
|-----------------------------------------------------------------------------------|----|-------------------------------------------------------------------------------------------|------------|--------|-------|-------|-------|-------|-------|
| 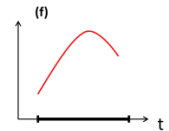 | 4  | Flood intertidal plain forest of the Equatorial Chocó                                     | 0.9        | 94.59  | 42.34 | 23.27 | 29.52 | 33.69 | 18.55 |
|                                                                                   | 34 | Semideciduous forest and shrubland of the South Valleys                                   | 228.53     | 3.44   | 0     | 46.60 | 48.19 | 48.76 | 47.54 |
|  | 9  | Semideciduous forest of the Equatorial Pacific coastal range                              | 774.36     | 85.72  | 17.75 | 13.20 | 12.41 | 13.31 | 13.37 |
|                                                                                   | 12 | Low montane seasonal evergreen forest of the Equatorial Pacific coastal range             | 928.82     | 72.57  | 7.48  | 18.68 | 17.60 | 18.31 | 18.51 |
|                                                                                   | 13 | Seasonal evergreen forest of the Jama-Zapotillo lowland                                   | 827.22     | 45.48  | 1.59  | 26.12 | 25.05 | 26.85 | 29.56 |
|                                                                                   | 11 | Piedmont seasonal evergreen forest of the Equatorial Pacific coastal range                | 2,569.96   | 57.26  | 2.61  | 25.83 | 24.41 | 24.36 | 25.20 |
|                                                                                   | 36 | High montane evergreen forest of the north-eastern Andean range                           | 2,544.60   | 85.80  | 62.46 | 10.08 | 9.94  | 9.80  | 10.35 |
|                                                                                   | 21 | High montane evergreen forest of the western Andean range                                 | 1,368.81   | 70.09  | 12.03 | 17.91 | 17.57 | 17.25 | 18.30 |
|                                                                                   | 35 | Páramo evergreen forest                                                                   | 87.87      | 1.70   | 15.55 | 62.92 | 62.00 | 61.73 | 62.34 |
|                                                                                   | 8  | Semideciduous forest of the Jama-Zapotillo lowland                                        | 2,277.58   | 71.67  | 2.87  | 15.44 | 14.95 | 15.51 | 17.53 |
|  | 20 | Montane evergreen forest of the western Andean range                                      | 3,265.97   | 82.41  | 19.85 | 10.92 | 11.24 | 10.98 | 12.62 |
|                                                                                   | 55 | Evergreen forest of the Aguarico-Putumayo-Caquetá lowland                                 | 9,694.52   | 93.89  | 36.86 | 4.69  | 5.26  | 5.10  | 6.30  |
|                                                                                   | 58 | Lowland evergreen forest of the Napo-Curaray                                              | 14,773.67  | 97.19  | 32.82 | 3.32  | 3.68  | 3.56  | 4.26  |
|                                                                                   | 17 | Seasonal flood alluvial plain evergreen forest of the Jama- Zapotillo                     | 17.41      | 7.40   | 0     | 50.86 | 51.42 | 37.52 | 41.77 |
|                                                                                   | 23 | Piedmont seasonal evergreen forest of the Catamayo-Alamor                                 | 971.21     | 48.83  | 0     | 21.88 | 24.48 | 21.26 | 30.06 |
|                                                                                   | 28 | Piedmont evergreen forest of the Catamayo-Alamor                                          | 33.4       | 60.47  | 0     | 21.81 | 25.77 | 19.14 | 26.39 |
|  | 60 | Flood forest and lacustrine-riparian vegetation of the Amazonian black water              | 112.73     | 89.34  | 96.61 | 10.43 | 10.40 | 10.39 | 10.34 |
|                                                                                   | 56 | Flood alluvial plain palm forest of the Amazon                                            | 4,723.65   | 98.57  | 53.97 | 6.58  | 6.67  | 6.68  | 6.82  |
|                                                                                   | 30 | Low montane semideciduous forest of the Catamayo-Alamor                                   | 660.61     | 41.94  | 0     | 28.75 | 29.63 | 29.72 | 29.06 |
|                                                                                   | 62 | Evergreen bamboo forest of the Amazonian lowland                                          | 24         | 100.00 | 0     | 0.67  | 0.67  | 0.67  | 0.67  |
|                                                                                   | 64 | Evergreen forest of the Pastaza fan-shaped lowland                                        | 5,752.98   | 97.37  | 0     | 4.48  | 4.86  | 4.52  | 4.76  |
|                                                                                   | 63 | Evergreen forest of the Tigre-Pastaza lowland                                             | 21,310.80  | 99.47  | 13.39 | 3.02  | 3.00  | 3.00  | 3.04  |
|                                                                                   | 42 | High montane evergreen forest of the south-eastern Andean range                           | 1,261.72   | 81.22  | 48.83 | 13.45 | 13.64 | 13.50 | 13.88 |
|                                                                                   | 38 | Low montane evergreen forest of the north-eastern Andean range                            | 4,247.87   | 97.39  | 67.20 | 4.11  | 3.97  | 4.06  | 4.78  |
|                                                                                   | 53 | Low montane evergreen forest on sandstone plateaus of the Cóndor-Kutukú range             | 385.68     | 98.93  | 26.70 | 3.37  | 3.15  | 3.34  | 3.28  |
|                                                                                   | 37 | Montane evergreen forest of the north-eastern Andean range                                | 4,520.11   | 97.81  | 74.85 | 3.99  | 4.01  | 4.03  | 4.47  |
|                                                                                   | 41 | Montane evergreen forest of the south-eastern Andean range                                | 4,040.90   | 93.55  | 32.22 | 6.26  | 6.55  | 6.70  | 7.03  |
|                                                                                   | 51 | Montane evergreen forest on sandstone plateaus of the Cóndor range                        | 250.35     | 97.53  | 63.82 | 3.34  | 3.16  | 3.17  | 3.55  |
|                                                                                   | 54 | Evergreen forest on sandstone plateaus of the Cóndor range in the lower Ecuadorian Amazon | 12.48      | 98.15  | 0.00  | 2.92  | 2.94  | 2.94  | 3.05  |
|                                                                                   | 16 | Jama-Zapotillo mangrove                                                                   | 134,133.21 | 79.34  | 29.24 | 15.48 | 15.42 | 16.04 | 15.67 |
