# Supplementary material
Source: MDPI journal article supplement (https://www.mdpi.com/2073-445X/11/2/287)

**Table S1.** The major land cover types and changes of ecosystem (n=64) in 1990, 2000, 2014 and 2014

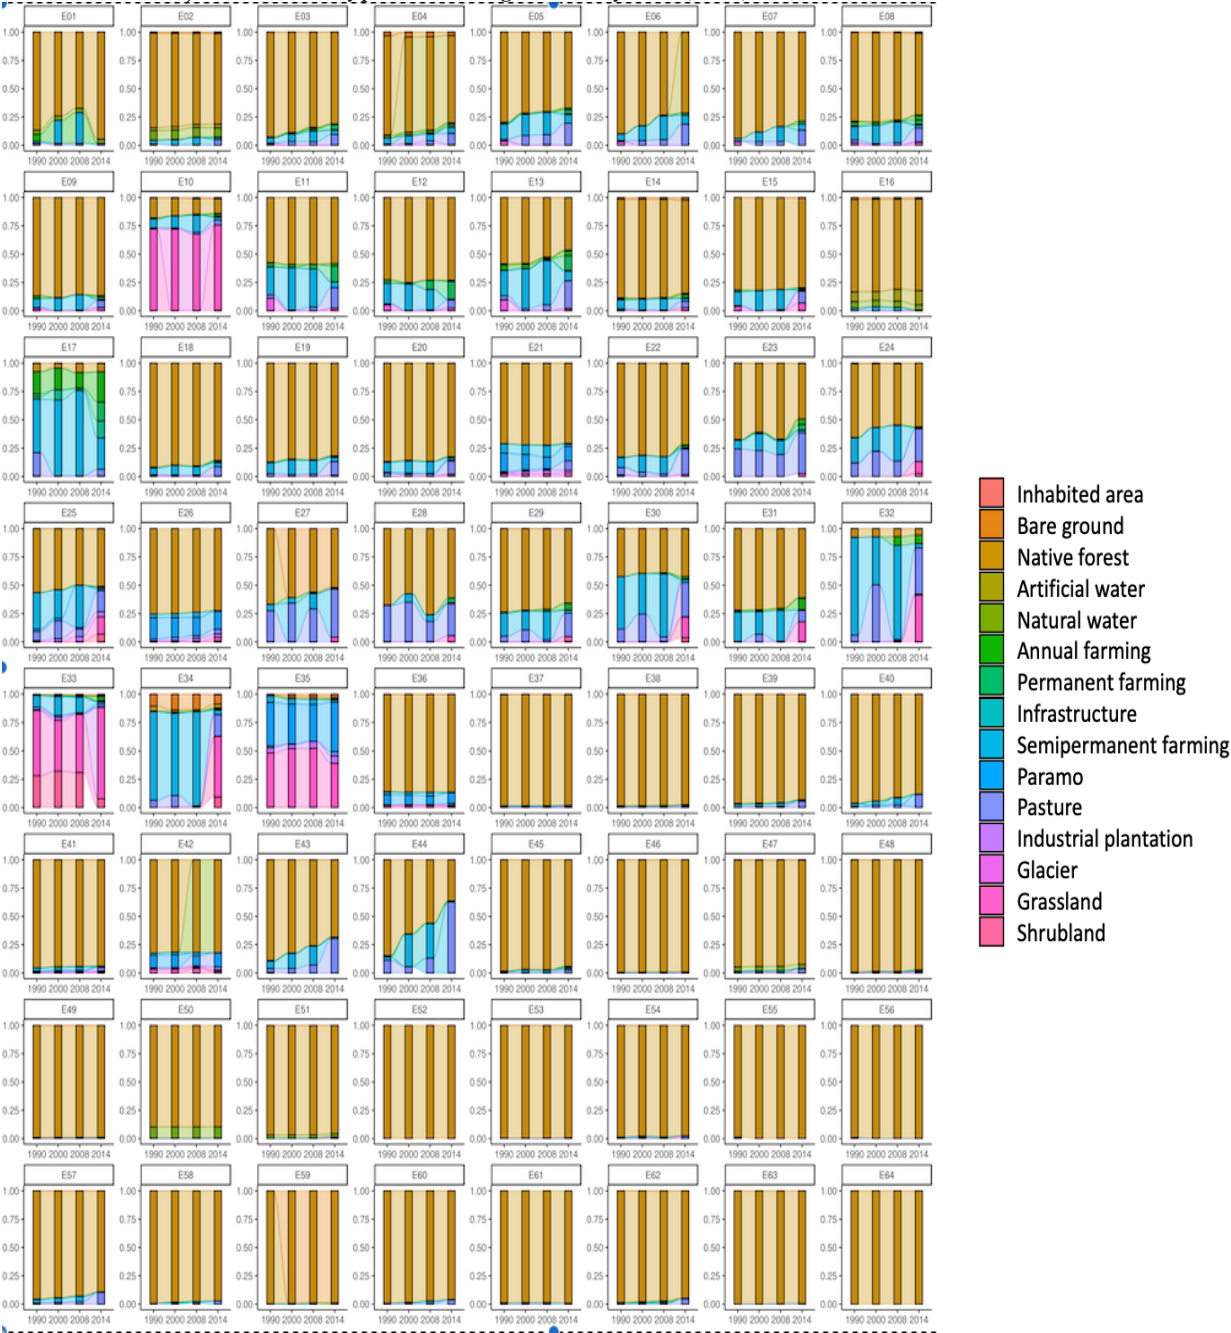

Supplement: s1 [file s1]
